# Supplementary material for: Brassica rapa L. crude polysaccharide meditated synbiotic fermented whey beverage ameliorates hypobaric hypoxia induced intestinal damage
Source: Royal Society of Chemistry journal article supplement (doi:10.1039/d4fo04667f), 2024-01-01
Supplement: d4fo04667f1.pdf [file d4fo04667f1.pdf]

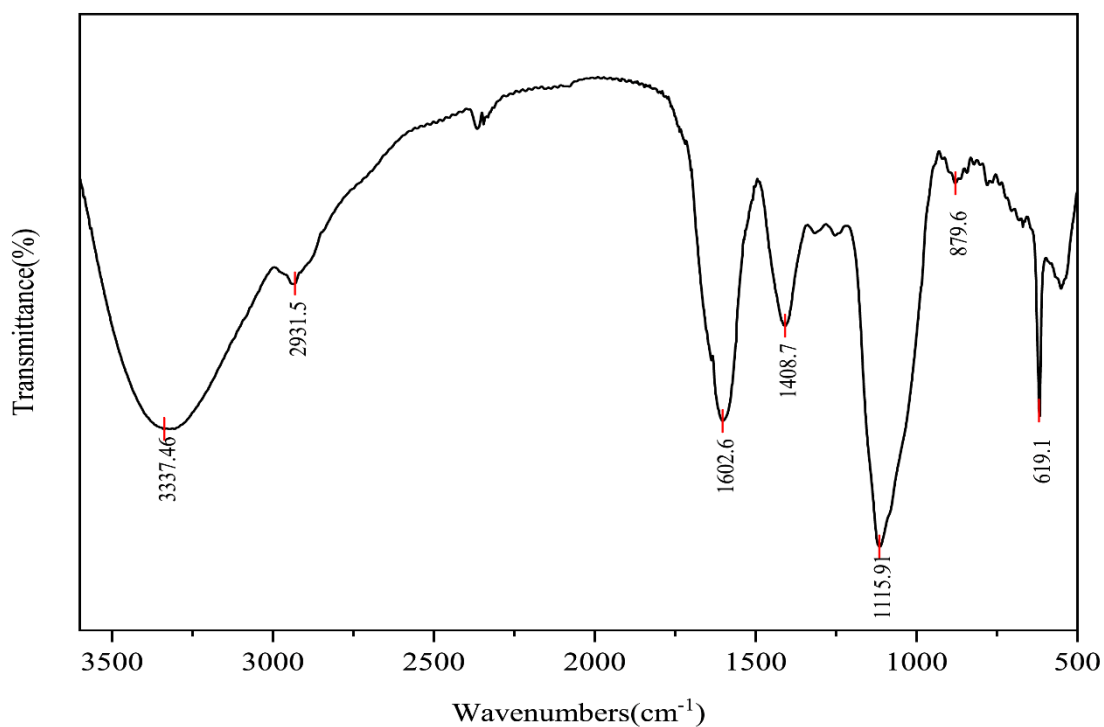

**Figure S1** FT-IR spectra of *Brassica rapa L.* polysaccharides.

**Table S1** Primary experimental materials, reagents, and their sources.

| Main materials and reagents                                  | Sources                                                                     |
|--------------------------------------------------------------|-----------------------------------------------------------------------------|
| Brassica rapa L.                                             | (Lhasa, Xizang, China)                                                      |
| Whey                                                         | (Lhasa, Xizang, China)                                                      |
| kefirMild lactic acid bacteria                               | (Danisco Deutschland GmbH, Germany)                                         |
| Sucrose                                                      | (Nanjing, China)                                                            |
| Carboxymethylcellulose                                       | (Shanghai, China)                                                           |
| Propyleneglycol alginate                                     | (Qingdao, China)                                                            |
| Tripolyphosphate                                             | (Chongqing, China)                                                          |
| Forage                                                       | (Ain-93M; Xietong Pharmaceutical Bio-engineering Co., Ltd., Jiangsu, China) |
| Formaldehyde                                                 | (Solarbio, Beijing, China)                                                  |
| Hematoxylin and Eosin (H&E) reagents                         | (Servicebio, Wuhan, China)                                                  |
| Alcian Blue and Periodic Acid-Schiff (AB-PAS) kit            | (Servicebio, Wuhan, China)                                                  |
| Terminal deoxynucleotidyl transferase dUTP nick end labeling | (Servicebio, Wuhan, China)                                                  |

---

|                                                  |                            |
|--------------------------------------------------|----------------------------|
| (TUNEL) kit                                      |                            |
| Total antioxidant capacity (T-AOC) kit           | (Solarbio, Beijing, China) |
| Superoxide dismutase (SOD) kit                   | (Solarbio, Beijing, China) |
| Glutathione peroxidase (GSH-Px) kit              | (Solarbio, Beijing, China) |
| Myeloperoxidase (MPO) kit                        | (Solarbio, Beijing, China) |
| Malondialdehyde (MDA) kit                        | (Solarbio, Beijing, China) |
| Tumor necrosis factor-alpha (TNF- $\alpha$ ) kit | (Mlbio, Shanghai, China)   |
| Interleukin-6 (IL-6) kit                         | (Mlbio, Shanghai, China)   |
| Interleukin-17 (IL-17) kit                       | (Mlbio, Shanghai, China)   |
| Interleukin-1 beta (IL-1 $\beta$ ) kit           | (Mlbio, Shanghai, China)   |

---

**Table S2** Dietary formulations employed in animal experiments.

---

| <b>Ingredient</b>   | <b>gm</b>   | <b>kcal</b> |
|---------------------|-------------|-------------|
| Casein, 30Mesh      | 140         | 560         |
| L-Cystine           | 1.8         | 7.2         |
| Corn Starch         | 495.692     | 1983        |
| Maltodextrin 10     | 125         | 500         |
| Sucrose             | 100         | 400         |
| Cellulose           | 50          | 0           |
| Soybean Oil         | 40          | 360         |
| t-Butylhydroquinone | 0.008       | 0           |
| Mineral Mix S10022M | 35          | 0           |
| Vitamin Mix V10037  | 10          | 40          |
| Choline Bitartrate  | 2.5         | 0           |
| <b>Total</b>        | <b>1000</b> | <b>3850</b> |

---

**Table S3** Data on daily food and water intake.

| Time   | Condition         | Group |       |      |      |
|--------|-------------------|-------|-------|------|------|
|        |                   | N     | NB    | H    | HB   |
| Day 1  | Food intake (g)   | 10.24 | 10.46 | 0.2  | 0.26 |
|        | Water intake (ml) | 22    | 22    | 1    | 1.33 |
| Day 2  | Food intake (g)   | 10.30 | 10.85 | 2.78 | 3.19 |
|        | Water intake (ml) | 24    | 23    | 1.67 | 1.67 |
| Day 3  | Food intake (g)   | 11.09 | 10.64 | 1.10 | 1.49 |
|        | Water intake (ml) | 24    | 20.67 | 1.67 | 2    |
| Day 4  | Food intake (g)   | 10.95 | 9.95  | 2.41 | 1.84 |
|        | Water intake (ml) | 21.67 | 22.33 | 2    | 2    |
| Day 5  | Food intake (g)   | 12.75 | 10.22 | 2.11 | 1.94 |
|        | Water intake (ml) | 20.33 | 22    | 2.33 | 2    |
| Day 6  | Food intake (g)   | 9.71  | 10.02 | 2.63 | 2.48 |
|        | Water intake (ml) | 22    | 21    | 3.33 | 3.67 |
| Day 7  | Food intake (g)   | 12.97 | 12.49 | 3.10 | 3.65 |
|        | Water intake (ml) | 28    | 25    | 5    | 5    |
| Day 8  | Food intake (g)   | 11.54 | 11.71 | 4.12 | 4.37 |
|        | Water intake (ml) | 23    | 23    | 5.33 | 7    |
| Day 9  | Food intake (g)   | 11.55 | 11.52 | 4.23 | 3.31 |
|        | Water intake (ml) | 26    | 24    | 9.67 | 6.33 |
| Day 10 | Food intake (g)   | 11.17 | 11.21 | 4.53 | 4.55 |
|        | Water intake (ml) | 23    | 22.33 | 3.33 | 5.67 |
| Day 11 | Food intake (g)   | 10.89 | 12.26 | 4.63 | 5.09 |
|        | Water intake (ml) | 25    | 23.67 | 8    | 7.67 |
| Day 12 | Food intake (g)   | 11.28 | 11.54 | 6.93 | 2.97 |
|        | Water intake (ml) | 24.33 | 22.33 | 11   | 13   |
| Day 13 | Food intake (g)   | 11.64 | 11.81 | 5.29 | 2.81 |
|        | Water intake (ml) | 25.67 | 26.33 | 2.33 | 4.33 |
| Day 14 | Food intake (g)   | 11.24 | 10.45 | 2.19 | 2.26 |

---

|                          |       |    |   |      |
|--------------------------|-------|----|---|------|
| <b>Water intake (ml)</b> | 25.22 | 22 | 1 | 1.33 |
|--------------------------|-------|----|---|------|

---

**Table S4** Nutrient composition of fermented beverages.

---

| <b>Norm</b>     | <b>Mean ± SD</b> | <b>Norm</b>     | <b>Mean ± SD</b> |
|-----------------|------------------|-----------------|------------------|
| Fat (%)         | 0.52±0.01        | Casein (%)      | 1.41±0.01        |
| Protein (%)     | 1.30±0.02        | Citric Acid (%) | 0.09±0.01        |
| Lactose (%)     | 7.13±0.02        | SNF (%)         | 14.87±0.03       |
| Low Lactose (%) | 7.02±0.12        | TS (%)          | 12.76±0.03       |
| Galactose (%)   | 5.07±0.04        | Acidity- Dornic | 4.38±0.03        |

---

**Table S5** Relative changes in the abundance of 11 metabolites.

| Metabolites                      | KEGG ID | H-N  |         |             |       | HB-H |         |             |       |
|----------------------------------|---------|------|---------|-------------|-------|------|---------|-------------|-------|
|                                  |         | VIP  | P-value | Fold_Change | Trend | VIP  | P-value | Fold_Change | Trend |
| 1D-myo-inositol 1,4-bisphosphate | C01220  | 1.74 | 0.00    | 7.04        | ↑     | 2.29 | 0.01    | 0.40        | ↓     |
| Ketoleucine                      | C00233  | 1.36 | 0.01    | 0.39        | ↓     | 1.94 | 0.02    | 2.61        | ↑     |
| 12(S)-HPETE                      | C05965  | 1.46 | 0.01    | 0.55        | ↓     | 2.06 | 0.01    | 1.36        | ↑     |
| Nicotinic acid                   | C00253  | 1.33 | 0.02    | 0.41        | ↓     | 1.88 | 0.02    | 1.62        | ↑     |
| Ortophosphate                    | C00009  | 1.34 | 0.00    | 0.52        | ↓     | 2.07 | 0.01    | 1.75        | ↑     |
| L-Carnitine                      | C00318  | 1.29 | 0.02    | 0.55        | ↓     | 1.66 | 0.05    | 1.37        | ↑     |
| Sorbitol                         | C00794  | 1.22 | 0.02    | 1.76        | ↑     | 1.77 | 0.04    | 0.62        | ↓     |
| Sucrose                          | C00089  | 1.25 | 0.02    | 2.00        | ↑     | 1.78 | 0.02    | 1.35        | ↑     |
| Irinotecan                       | C16641  | 1.64 | 0.00    | 8.60        | ↑     | 1.58 | 0.04    | 0.50        | ↓     |
| Berberine                        | C00757  | 1.18 | 0.01    | 0.48        | ↓     | 1.36 | 0.04    | 1.59        | ↑     |
| Quercetin                        | C00389  | 1.02 | 0.04    | 0.62        | ↓     | 2.99 | 0.00    | 0.22        | ↓     |
